# Supplementary material
Source: ML conference proceedings conference paper supplement (https://openaccess.thecvf.com/content/ICCV2021/html/Sheynin_A_Hierarchical_Transformation-Discriminating_ICCV_2021_paper.html)
Supplement: Supplementary file 1 [file Sheynin_A_Hierarchical_Transformation-Discriminating_ICCV_2021_supplemental.pdf]

# Supplementary Material for A Hierarchical Transformation-Discriminating Generative Model for Few Shot Anomaly Detection

Shelly Sheynin<sup>1\*</sup>   Sagie Benaim<sup>1\*</sup>   Lior Wolf<sup>1,2</sup>

<sup>1</sup>The School of Computer Science, Tel Aviv University

<sup>2</sup>Facebook AI Research

## 1. Transformations

As discussed in Sec. 3.1 of the main text, due to memory constraints, we use a subset of  $M = 54$  transformations. Let  $T_{rgb2gray}$  be the transformation of an image from RGB to grayscale.  $T_{flip}^1$  is a horizontal flip and  $T_{flip}^0$  is the identity transformation.  $T_{translate_x}^b$  is the horizontal translation along the x-axis by 15% of the image width, to the left ( $b = 1$ ) or to the right ( $b = -1$ ).  $b = 0$  is the identity translation.  $T_{translate_y}^c$  is the vertical translation along the y-axis by 15% of the image height, upwards ( $c = 1$ ) or downwards ( $c = -1$ ).  $c = 0$  is the identity translation.  $T_{rotate}^d$  stands for the rotation by  $d$  degrees, where  $d \in \{0, 90, 180, 270\}$ .  
 $T_1, \dots, T_{32}$ :  $T_{flip}^a \circ T_{translate_x}^b \circ T_{translate_y}^c \circ T_{rotate}^d$  where  $a \in \{0, 1\}$ ,  $b \in \{0, 1\}$ ,  $c \in \{0, 1\}$  and  $d \in \{0, 90, 180, 270\}$ .

$T_{33}, \dots, T_{38}$ :  $T_{flip}^a \circ T_{translate_x}^b \circ T_{translate_y}^c$ , where  $a \in \{0, 1\}$ ,  $b \in \{-1, 1, 0\}$  and  $c = -1$ .

$T_{39}, \dots, T_{42}$ :  $T_{flip}^a \circ T_{translate_x}^b \circ T_{translate_y}^c$ , where  $a \in \{0, 1\}$ ,  $b = -1$  and  $c \in \{0, 1\}$ .

$T_{43}, \dots, T_{50}$ :  $T_{rgb2gray} \circ T_{flip}^a \circ T_{rotate}^d$ , where  $a \in \{0, 1\}$  and  $d \in \{0, 90, 180, 270\}$ .

$T_{51}, T_{52}$ :  $T_{rgb2gray} \circ T_{translate_x}^b$  where  $b \in \{-1, 1\}$ .

$T_{53}, T_{54}$ :  $T_{rgb2gray} \circ T_{translate_y}^c$  where  $c \in \{-1, 1\}$ .

## 2. Detailed Per-Class Results

In Sec. 4 of the main text, for the task of anomaly detection and defect detection, we report mean AUC values and mean standard deviation values, over all classes. Detailed per-class results are provided here.

In particular, full anomaly detection results for the datasets of Paris, CIFAR10, FashionMNIST and MNIST are given in Tab. 4 (one-shot), Tab. 5 (five-shot) and Tab. 6 (ten-shot). This supplements Fig. 2 of the main text. 50-shot and 80-shot results for CIFAR10 are given in Tab. 7. Together with tables 4-6, this supplements Fig. 4 of the main

text.

Tab. 8 gives the full defect detection results on MVTEC for one-shot, five-shot and ten-shot settings, supplementing Fig. 5 of the main text.

Tab. 9, gives the ablation analysis performed on CIFAR10, for both the one-shot and five-shot settings, supplementing Tab. 1 and discussed in Sec. 4.3 of the main text.

Lastly, Tab. 10, shows the effect of using a different percentage of patches for defect detection, supplementing Fig. 7 and discussed in Sec. 4.3 of the main text.

## 3. Additional analyses

### 3.1. Transformations analysis

In addition to ours/no transformations, we consider subsets of transformations, for MNIST one-shot or CIFAR one-shot. The results are reported in Tab. 1. As can be seen, our subset achieves the best performance. We consider horizontal flips (a), rotations (b), translations (c), horizontal flips and rotations (d), grayscale (only for CIFAR10) (e), all compositions of transformations grayscale (overall 72 transformations) (f), and without transformations (g). It is important to note that using only translations or horizontal flips, we cannot discriminate many classes (for MNIST - the digits: 0, 8, and for CIFAR10-all the classes) resulting in a drop in performance, that improved when adding transformations.

### 3.2. Anomaly score analysis

Our anomaly score (Eq. 12) takes into account the scales, patches, and transformations. In Tab. 2, we consider alternative scores for one-shot CIFAR10 (as in Sec. 4.3). In particular, in (a), we pick the score of the fake class. However, this does not take into account the ability to correctly discriminate the transformation, hence resulting in a lower score. In (b) we also consider taking the maximum score over patches instead of a sum as in Eq. 12, and in (c) the maximum score over scales instead of a sum.

\*Equal contribution

| Transformation set | (a)         | (b)        | (c)         | (d)        | (e)        | (f)        | (g)        | Ours              |
|--------------------|-------------|------------|-------------|------------|------------|------------|------------|-------------------|
| MNIST              | 68.7 ± 10.7 | 78.9 ± 8.5 | 71.6 ± 14.0 | 76.4 ± 7.3 | -          | 75.8 ± 5.9 | 74.9 ± 8.4 | <b>79.3 ± 5.6</b> |
| CIFAR              | 50.5 ± 0.5  | 58.5 ± 4.5 | 54.8 ± 5.9  | 58.1 ± 4.6 | 59.1 ± 7.4 | 61.4 ± 6.3 | 59.1 ± 7.3 | <b>64.9 ± 5.9</b> |

Table 1. **Transformation analysis for One-Shot anomaly detection.** (a) horizontal flips, (b) rotations, (c) translations, (d) horizontal flips and rotations, (e) just grayscale conversion (f) all compositions of transformations w/o grayscale, (g) w/o transformation

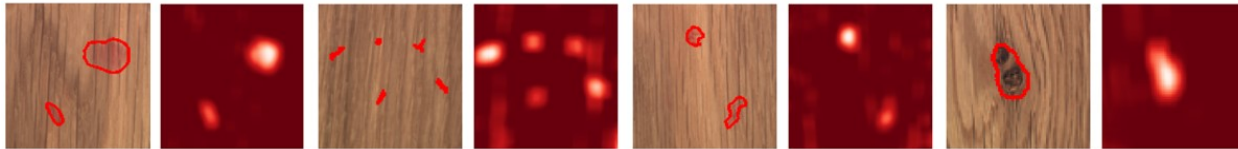

Figure 1. The multiscale schemes detect defects of different sizes.

| Score | (a)        | (b)        | (c)        | Ours              |
|-------|------------|------------|------------|-------------------|
| CIFAR | 58.1 ± 3.9 | 59.3 ± 6.2 | 63.4 ± 4.7 | <b>64.9 ± 5.9</b> |

Table 2. **Anomaly score analysis for One-Shot anomaly detection.** We consider alternative scores: (a), we pick the fake class, (b) Taking a maximum over patches instead of a sum, (c) Taking a maximum over scales instead of a sum

| X-shot          | Ours |      |      |       | DifferNet [29] |      |      |     |
|-----------------|------|------|------|-------|----------------|------|------|-----|
|                 | 1    | 5    | 10   | 100   | 1              | 5    | 10   | 100 |
| Params (K)      | 559  | 559  | 559  | 559   | 233            | 233  | 233  | 233 |
| Train time (h)  | 0.9  | 1.6  | 1.8  | 2.6   | 0.007          | 0.03 | 0.05 | 0.4 |
| Test time (sec) | 54   | 54   | 54   | 54    | 426            | 426  | 426  | 426 |
| Peak mem. (GB)  | 2.2  | 10.9 | 21.8 | 212.9 | 2.9            | 3.3  | 3.7  | 5.1 |

Table 3. Comparison of computational cost.

DifferNet [29] baseline. We also perform timing of training an inference speed on NVIDIA V100. We train the one-shot, five-shot and ten-shot settings on a single node with 1 GPU, and the 100-shot on a single node with 8 GPU.

### 3.3. Generated samples analysis

Images are considered non-anomalous if their multiscale patch distribution lies in that of input images. We argue that this is a valid assumption - In Fig. 3, middle image, for instance, no other monument, other than the Louvre, depicts similar structure. To check this, we consider 1000 generated samples by (i) our one-Shot model, (ii) Singan[28], for CIFAR10. We consider the setting of our paper, where generated images replace real normal samples. Our model gives an AUC of 100.0 for the samples generated by (i) and both by (ii). For reference, standard many-image GEOM model [10] gives AUC of 69.5 for (i) and AUC of 70.6 for (ii) indicating it relies less on local structure.

### 3.4. Defect localization analysis

As our method models patches at different scale, it enjoys the property of detecting multiple defects, each one can be of different size, as shown in Fig 1.

## 4. Computational cost and model size

Tab. 3 shows the computational cost of our model and

| Class        | PatchSVDD   | DROCC             | DeepSVDD           | GEOM              | GOAD        | Ours              |
|--------------|-------------|-------------------|--------------------|-------------------|-------------|-------------------|
| PARIS        |             |                   |                    |                   |             |                   |
| Defense      | 57.0 ± 3.5  | 53.2 ± 8.0        | 50.1 ± 5.0         | 59.4 ± 3.1        | 47.8 ± 5.9  | <b>65.6 ± 9.9</b> |
| Eiffel       | 46.2 ± 6.2  | 53.3 ± 7.9        | 45.8 ± 6.7         | 46.9 ± 6.0        | 54.6 ± 3.3  | <b>57.8 ± 4.5</b> |
| Invalides    | 46.0 ± 8.2  | 52.3 ± 5.1        | 50.3 ± 6.4         | 56.1 ± 2.9        | 52.9 ± 3.8  | <b>71.0 ± 6.4</b> |
| Louvre       | 47.3 ± 5.5  | 57.5 ± 3.3        | 50.1 ± 3.0         | 53.7 ± 4.5        | 52.6 ± 3.1  | <b>61.7 ± 7.2</b> |
| Moulinrouge  | 60.4 ± 10.2 | 43.7 ± 6.4        | 64.6 ± 2.1         | 9.4 ± 7.6         | 51.6 ± 5.9  | <b>72.8 ± 6.8</b> |
| Museedorsay  | 55.7 ± 8.0  | 42.3 ± 3.7        | 85.9 ± 1.9         | <b>85.1 ± 2.7</b> | 49.3 ± 16.8 | 73.1 ± 10.2       |
| Notredame    | 52.3 ± 4.8  | 46.9 ± 4.6        | 58.5 ± 3.1         | 52.2 ± 5.1        | 49.8 ± 5.7  | <b>66.0 ± 9.4</b> |
| Pantheon     | 62.8 ± 3.7  | 44.2 ± 6.6        | 54.8 ± 12.0        | 58.5 ± 7.8        | 49.9 ± 5.6  | <b>73.8 ± 8.8</b> |
| Pompidou     | 56.7 ± 10.2 | 47.8 ± 8.9        | 65.5 ± 3.6         | 65.3 ± 8.1        | 49 ± 7.8    | <b>68.3 ± 9.4</b> |
| Sacrecoeur   | 55.1 ± 7.9  | 51.8 ± 8.4        | 52.1 ± 4.3         | 48.4 ± 6.7        | 52 ± 3.5    | <b>61.6 ± 8.5</b> |
| Triomphe     | 57.5 ± 3.8  | 44.2 ± 5.9        | 59.2 ± 5.4         | 48.9 ± 5.6        | 49 ± 5.7    | <b>60.8 ± 5.5</b> |
| Avg          | 54.3 ± 6.5  | 48.8 ± 6.2        | 57.9 ± 4.9         | 56.7 ± 5.5        | 50.8 ± 6.1  | <b>66.6 ± 7.9</b> |
| CIFAR10      |             |                   |                    |                   |             |                   |
| Plane        | 50.1 ± 15.8 | 54.9 ± 9.3        | 29.8 ± 5.5         | 49.5 ± 11.1       | 59.8 ± 8.3  | <b>67.2 ± 5.8</b> |
| Car          | 51.4 ± 6.3  | 35.2 ± 7.4        | <b>81.0 ± 13.5</b> | 53.3 ± 5.7        | 58.2 ± 5.8  | 65.6 ± 5.9        |
| Bird         | 46.5 ± 8.6  | <b>59.5 ± 3.7</b> | 50.4 ± 22.4        | 54.7 ± 6.6        | 53.1 ± 9.1  | 55.9 ± 5.7        |
| Cat          | 48.9 ± 6.1  | 52.3 ± 5.5        | 58.8 ± 12.7        | 53.2 ± 4.4        | 46.4 ± 8.2  | <b>58.9 ± 6.2</b> |
| Deer         | 46.5 ± 10.7 | 65.7 ± 5.9        | 56.4 ± 10.6        | <b>67.3 ± 6.4</b> | 55.9 ± 10.7 | 67.2 ± 4.5        |
| Dog          | 54.4 ± 6.3  | 52.7 ± 8.1        | 22.8 ± 2.0         | 50.9 ± 2.7        | 53.7 ± 6.0  | <b>63.7 ± 7.7</b> |
| Frog         | 53.4 ± 17.4 | 53.1 ± 6.8        | 60.2 ± 15.9        | 60.7 ± 8.6        | 53.6 ± 9.9  | <b>70.2 ± 5.1</b> |
| Horse        | 52.7 ± 5.1  | 43.5 ± 6.1        | <b>78.6 ± 13.1</b> | 56.0 ± 4.6        | 54.8 ± 7.6  | 63.8 ± 5.2        |
| Ship         | 55.6 ± 13.5 | 57.3 ± 9.0        | 70.8 ± 7.9         | 68.1 ± 10.4       | 67.4 ± 6.4  | <b>71.3 ± 7.2</b> |
| Truck        | 60.8 ± 8.1  | 33.6 ± 5.2        | <b>69.8 ± 6.6</b>  | 57.2 ± 12.0       | 61.1 ± 5.5  | 65.3 ± 5.2        |
| Avg          | 52.0 ± 9.8  | 50.8 ± 6.7        | 57.9 ± 11.0        | 57.1 ± 7.3        | 56.4 ± 7.8  | <b>64.9 ± 5.9</b> |
| MNIST        |             |                   |                    |                   |             |                   |
| 0            | 46.6 ± 19.4 | 63.4 ± 14.1       | <b>78.6 ± 12.7</b> | 73.1 ± 5.9        | 77.2 ± 9.1  | 75.2 ± 5.8        |
| 1            | 82.5 ± 18.1 | 81.6 ± 5.6        | 69.8 ± 7.9         | <b>88.7 ± 5.0</b> | 80.2 ± 18.3 | 79.2 ± 6.9        |
| 2            | 56.0 ± 6.3  | 43.0 ± 9.2        | 67.0 ± 7.9         | 60.9 ± 14.4       | 72.5 ± 4.4  | <b>74.3 ± 3.4</b> |
| 3            | 63.1 ± 1.7  | 54.3 ± 8.7        | 61.8 ± 29.4        | 77.0 ± 3.2        | 80.7 ± 6.9  | <b>94.3 ± 4.8</b> |
| 4            | 53.6 ± 8.4  | 59.1 ± 10.4       | 63.2 ± 5.1         | 66.9 ± 8.4        | 63.8 ± 5.9  | <b>81.6 ± 7.6</b> |
| 5            | 60.2 ± 6.6  | 61.9 ± 9.5        | 65.2 ± 4.0         | 72.1 ± 8.3        | 54.5 ± 12.8 | <b>80.3 ± 7.2</b> |
| 6            | 59.0 ± 11.7 | 65.5 ± 6.7        | 78.2 ± 4.9         | 66.2 ± 20.2       | 70.2 ± 4.2  | <b>85.7 ± 3.4</b> |
| 7            | 49.2 ± 14.0 | 70.1 ± 12.0       | 70.2 ± 3.2         | 69.5 ± 8.9        | 66.4 ± 10.3 | <b>76.9 ± 4.0</b> |
| 8            | 53.7 ± 15.6 | 57.5 ± 7.4        | <b>72.4 ± 3.7</b>  | 56.2 ± 2.1        | 71.7 ± 4.7  | 71.5 ± 6.2        |
| 9            | 56.3 ± 8.9  | 70.3 ± 7.2        | 61.8 ± 9.0         | 67.6 ± 4.3        | 59.8 ± 5.1  | <b>73.5 ± 6.4</b> |
| Avg          | 58.0 ± 11.1 | 62.7 ± 9.1        | 68.8 ± 8.8         | 69.8 ± 8.1        | 69.7 ± 8.2  | <b>79.3 ± 5.6</b> |
| FashionMNIST |             |                   |                    |                   |             |                   |
| T-shirt      | 58.5 ± 5.6  | 69.7 ± 8.1        | <b>83.5 ± 6.9</b>  | 79.7 ± 2.9        | 71.8 ± 14.1 | 77.3 ± 4.3        |
| Trouser      | 32.0 ± 18.6 | 95.2 ± 1.7        | 63.5 ± 9.2         | 55.5 ± 4.3        | 76.0 ± 3.7  | <b>97.2 ± 1.4</b> |
| Pullover     | 73.7 ± 8.7  | 68.0 ± 8.9        | 66.7 ± 7.3         | 56.9 ± 12.1       | 69.1 ± 5.6  | <b>80.3 ± 4.2</b> |
| Dress        | 43.0 ± 9.8  | 80.9 ± 6.6        | 63.1 ± 16.3        | 72.5 ± 10.5       | 76.9 ± 13.1 | <b>83.8 ± 4.0</b> |
| Coat         | 73.3 ± 4.9  | 63.5 ± 15.1       | 63.6 ± 12.0        | 52.2 ± 16.1       | 66.2 ± 18.8 | <b>79.0 ± 9.2</b> |
| Sandals      | 39.1 ± 26.4 | 74.3 ± 8.4        | 64.9 ± 9.8         | 78.5 ± 9.7        | 57.9 ± 10.1 | <b>85.5 ± 4.5</b> |
| Shirt        | 70.2 ± 2.7  | 64.9 ± 8.9        | <b>75.1 ± 6.2</b>  | 56.1 ± 5.6        | 72.8 ± 3.1  | 69.0 ± 2.4        |
| Sneaker      | 58.1 ± 25.7 | 90.5 ± 9.1        | 59.1 ± 12.0        | 92.6 ± 2.1        | 69.2 ± 1.7  | <b>97.9 ± 0.7</b> |
| Bag          | 70.2 ± 2.1  | 53.6 ± 7.4        | 72.4 ± 3.3         | <b>92.2 ± 9.1</b> | 71.7 ± 9.9  | 77.2 ± 15.4       |
| Ankle-Boot   | 73.2 ± 9.2  | 81.9 ± 14.7       | 71.2 ± 8.5         | 62.0 ± 5.8        | 61.6 ± 10.6 | <b>91.7 ± 6.1</b> |
| Avg          | 59.1 ± 11.4 | 74.2 ± 8.9        | 68.3 ± 9.2         | 69.8 ± 7.8        | 69.3 ± 9.1  | <b>83.9 ± 5.2</b> |

Table 4. Average AUC (with standard deviation) for **One-Shot** anomaly detection experiments on Paris, CIFAR10, FashionMNIST and MNIST datasets.

| Class        | PatchSVDD   | DROCC             | DeepSVDD          | GEOM              | GOAD              | Ours              |
|--------------|-------------|-------------------|-------------------|-------------------|-------------------|-------------------|
| PARIS        |             |                   |                   |                   |                   |                   |
| Defense      | 51.5 ± 3.3  | <b>69.3 ± 4.5</b> | 62.1 ± 3.3        | 59.4 ± 2.7        | 52.8 ± 5.1        | 67.8 ± 3.4        |
| Eiffel       | 51.2 ± 4.3  | 66.8 ± 3.5        | 55.4 ± 2.8        | 44.1 ± 6.6        | 53.0 ± 3.0        | <b>67.0 ± 2.7</b> |
| Invalides    | 45.2 ± 2.1  | 62.9 ± 6.4        | 66.6 ± 4.9        | 59.2 ± 2.0        | 52.2 ± 4.5        | <b>80.8 ± 2.5</b> |
| Louvre       | 41.1 ± 2.0  | 66.6 ± 3.3        | 60.4 ± 4.3        | 53.3 ± 1.8        | 52.3 ± 2.7        | <b>72.5 ± 2.8</b> |
| Moulinrouge  | 59.6 ± 3.1  | 44.1 ± 5.4        | 62.4 ± 5.1        | 49.0 ± 0.3        | 45.9 ± 7.3        | <b>84.5 ± 2.4</b> |
| Museedorsay  | 53.9 ± 2.7  | 46.8 ± 9.6        | 88.0 ± 3.3        | 88.7 ± 3.2        | 43.0 ± 15.2       | <b>89.6 ± 1.8</b> |
| Notredame    | 47.7 ± 2.8  | 48.7 ± 6.6        | 62.6 ± 3.5        | 58.4 ± 1.7        | 48.2 ± 5.7        | <b>79.7 ± 4.0</b> |
| Pantheon     | 58.4 ± 5.2  | 49.2 ± 6.6        | 74.9 ± 2.5        | 60.7 ± 1.8        | 52.3 ± 2.3        | <b>86.1 ± 2.1</b> |
| Pompidou     | 58.7 ± 3.4  | 45.7 ± 7.4        | 75.6 ± 3.4        | 70.0 ± 2.7        | 54.1 ± 5.8        | <b>90.3 ± 3.4</b> |
| Sacrecoeur   | 46.9 ± 7.8  | 58.5 ± 5.1        | 62.5 ± 4.3        | 48.1 ± 0.8        | 54.8 ± 7.2        | <b>81.6 ± 2.7</b> |
| Triomphe     | 55.5 ± 2.6  | 47.4 ± 4.4        | 64.2 ± 9.4        | 52.4 ± 1.7        | 51.1 ± 3.8        | <b>78.6 ± 4.8</b> |
| Avg          | 51.8 ± 3.6  | 55.1 ± 5.7        | 66.8 ± 4.2        | 58.5 ± 2.3        | 50.9 ± 5.7        | <b>79.8 ± 3.0</b> |
| CIFAR10      |             |                   |                   |                   |                   |                   |
| Plane        | 40.8 ± 13.8 | 69.0 ± 4.8        | 35.8 ± 3.1        | 62.3 ± 9.0        | 59.5 ± 3.0        | <b>69.2 ± 2.8</b> |
| Car          | 59.5 ± 4.5  | 39.6 ± 8.8        | 74.6 ± 5.3        | 65.5 ± 7.7        | 68.8 ± 10.1       | <b>77.0 ± 1.8</b> |
| Bird         | 45.7 ± 6.0  | <b>60.9 ± 3.4</b> | 48.4 ± 5.2        | 52.4 ± 4.8        | 49.4 ± 3.4        | 58.4 ± 2.3        |
| Cat          | 55.6 ± 3.2  | 56.5 ± 4.9        | 54.4 ± 10.7       | 54.0 ± 5.2        | 49.0 ± 7.0        | <b>58.7 ± 4.3</b> |
| Deer         | 44.5 ± 5.3  | 57.9 ± 5.4        | 51.4 ± 5.8        | 63.6 ± 7.6        | 48.8 ± 5.5        | <b>66.4 ± 4.3</b> |
| Dog          | 54.4 ± 3.0  | 59.4 ± 6.1        | <b>70.4 ± 6.1</b> | 55.5 ± 3.4        | 60.9 ± 11.5       | 61.8 ± 3.2        |
| Frog         | 53.7 ± 5.6  | 50.2 ± 7.7        | 56.0 ± 5.7        | 58.5 ± 6.9        | 51.5 ± 2.7        | <b>72.6 ± 4.4</b> |
| Horse        | 55.4 ± 3.2  | 43.6 ± 4.3        | <b>69.7 ± 5.9</b> | 64.2 ± 3.1        | 62.0 ± 4.9        | 68.6 ± 2.8        |
| Ship         | 48.3 ± 10.3 | 67.5 ± 6.7        | 73.4 ± 4.4        | 75.5 ± 7.9        | 74.2 ± 3.6        | <b>80.2 ± 3.2</b> |
| Truck        | 62.6 ± 2.2  | 35.9 ± 5.5        | 70.3 ± 4.7        | 67.5 ± 4.0        | <b>74.2 ± 1.7</b> | 62.1 ± 4.5        |
| Avg          | 52.1 ± 5.7  | 54.1 ± 5.8        | 60.4 ± 5.7        | 59.5 ± 6.0        | 59.9 ± 5.3        | <b>67.5 ± 3.4</b> |
| MNIST        |             |                   |                   |                   |                   |                   |
| 0            | 76.6 ± 2.5  | 70.7 ± 9.0        | 86.8 ± 3.2        | 71.3 ± 6.3        | <b>87.4 ± 8.0</b> | 79.5 ± 3.8        |
| 1            | 31.5 ± 9.9  | 80.6 ± 7.5        | 89.6 ± 5.3        | <b>96.2 ± 0.5</b> | 89.2 ± 6.8        | 85.5 ± 6.7        |
| 2            | 73.5 ± 5.2  | 56.4 ± 10.2       | 73.4 ± 5.2        | 78.0 ± 2.6        | 71.3 ± 7.3        | <b>81.6 ± 4.2</b> |
| 3            | 71.0 ± 5.5  | 63.4 ± 5.3        | 77.2 ± 10.7       | 85.5 ± 0.7        | 80.9 ± 4.6        | <b>96.6 ± 1.0</b> |
| 4            | 45.0 ± 5.8  | 69.6 ± 3.5        | 76.8 ± 5.8        | 66.4 ± 5.6        | 70.3 ± 5.2        | <b>84.7 ± 1.3</b> |
| 5            | 62.6 ± 3.0  | 69.1 ± 7.2        | 65.6 ± 6.1        | 79.0 ± 8.5        | 70.4 ± 12.8       | <b>89.3 ± 2.4</b> |
| 6            | 55.5 ± 4.3  | 73.9 ± 7.5        | 80.0 ± 5.7        | 76.1 ± 4.6        | 72.6 ± 3.9        | <b>92.4 ± 0.9</b> |
| 7            | 35.2 ± 8.3  | 80.4 ± 7.2        | 81.0 ± 5.9        | 80.3 ± 3.8        | 67.1 ± 5.7        | <b>82.0 ± 3.7</b> |
| 8            | 64.9 ± 6.5  | 64.4 ± 4.6        | <b>82.2 ± 4.4</b> | 70.7 ± 4.0        | 73.4 ± 5.1        | 79.4 ± 3.4        |
| 9            | 42.2 ± 6.4  | 76.7 ± 6.3        | 79.2 ± 4.7        | 65.7 ± 1.9        | 72.5 ± 3.9        | <b>87.5 ± 3.2</b> |
| Avg          | 55.8 ± 5.7  | 70.5 ± 6.8        | 79.1 ± 5.7        | 76.9 ± 3.9        | 75.5 ± 6.3        | <b>85.9 ± 3.1</b> |
| FashionMNIST |             |                   |                   |                   |                   |                   |
| T-shirt      | 52.8 ± 6.0  | 85.2 ± 3.1        | 89.6 ± 2.4        | <b>92.4 ± 2.7</b> | 79.8 ± 2.7        | 85.2 ± 1.7        |
| Trouser      | 42.2 ± 10.7 | 94.2 ± 2.2        | 84.8 ± 7.1        | 74.7 ± 2.7        | 97.8 ± 0.5        | <b>98.4 ± 0.5</b> |
| Pullover     | 64.7 ± 7.0  | 80.5 ± 3.3        | 72.3 ± 7.1        | 84.3 ± 3.6        | <b>86.4 ± 2.2</b> | 85.8 ± 3.5        |
| Dress        | 41.7 ± 7.6  | 86.3 ± 4.4        | 77.8 ± 4.9        | 87.8 ± 1.0        | 85.1 ± 2.0        | <b>89.1 ± 2.4</b> |
| Coat         | 62.8 ± 6.1  | 81.5 ± 3.9        | 76.8 ± 7.0        | 78.4 ± 2.0        | 83.8 ± 1.9        | <b>88.4 ± 1.5</b> |
| Sandals      | 60.1 ± 8.5  | 78.1 ± 15.0       | 63.8 ± 8.0        | 83.7 ± 2.0        | 65.9 ± 7.6        | <b>88.6 ± 2.1</b> |
| Shirt        | 54.8 ± 6.6  | 72.0 ± 3.5        | <b>81.5 ± 8.0</b> | 73.8 ± 3.7        | 68.0 ± 3.1        | 78.2 ± 1.7        |
| Sneaker      | 53.0 ± 10.7 | 93.2 ± 1.6        | 81.6 ± 7.4        | 94.6 ± 1.9        | 94.4 ± 1.0        | <b>99.1 ± 0.3</b> |
| Bag          | 53.4 ± 5.3  | 67.6 ± 8.7        | 80.1 ± 3.1        | <b>96.6 ± 1.4</b> | 77.5 ± 6.0        | 92.9 ± 4.1        |
| Ankle-Boot   | 56.4 ± 9.1  | 90.0 ± 6.9        | 82.1 ± 5.4        | 83.7 ± 4.7        | <b>96.6 ± 1.5</b> | 96.5 ± 1.0        |
| Avg          | 54.2 ± 7.8  | 82.9 ± 5.3        | 79.0 ± 6.0        | 85.0 ± 2.6        | 83.5 ± 2.9        | <b>90.2 ± 1.9</b> |

Table 5. Average AUC (with standard deviation) for **Five-Shot** anomaly detection experiments on Paris, CIFAR10, FashionMNIST and MNIST datasets.

| Class        | PatchSVDD   | DROCC             | DeepSVDD          | GEOM              | GOAD              | Ours              |
|--------------|-------------|-------------------|-------------------|-------------------|-------------------|-------------------|
| PARIS        |             |                   |                   |                   |                   |                   |
| Defense      | 54.2 ± 4.1  | <b>72.0 ± 4.5</b> | 62.7 ± 2.3        | 57.2 ± 1.6        | 49.5 ± 3.3        | 67.9 ± 3.2        |
| Eiffel       | 48.1 ± 4.8  | <b>73.6 ± 3.3</b> | 59.4 ± 1.9        | 47.2 ± 5.6        | 50.0 ± 0.0        | 71.2 ± 3.7        |
| Invalides    | 42.7 ± 2.8  | 68.0 ± 4.8        | 67.4 ± 2.0        | 63.4 ± 1.0        | 49.9 ± 0.0        | <b>84.9 ± 1.2</b> |
| Louvre       | 39.4 ± 1.9  | 73.5 ± 4.3        | 60.6 ± 3.3        | 53.4 ± 1.8        | 49.2 ± 1.6        | <b>74.9 ± 2.5</b> |
| Moulinrouge  | 59.4 ± 4.3  | 46.6 ± 2.5        | 63.6 ± 3.4        | 51.7 ± 0.8        | 48.8 ± 2.2        | <b>87.0 ± 3.1</b> |
| Museedorsay  | 58.4 ± 4.0  | 52.3 ± 3.2        | 89.4 ± 2.0        | 86.0 ± 5.1        | 55.5 ± 6.9        | <b>90.7 ± 2.2</b> |
| Notredame    | 52.0 ± 3.2  | 52.5 ± 4.6        | 65.8 ± 2.9        | 55.3 ± 1.0        | 49.9 ± 3.1        | <b>83.0 ± 2.9</b> |
| Pantheon     | 54.5 ± 4.9  | 57.2 ± 6.4        | 75.7 ± 1.6        | 62.3 ± 0.8        | 50.3 ± 0.7        | <b>89.9 ± 2.1</b> |
| Pompidou     | 59.9 ± 5.6  | 50.3 ± 4.6        | 77.6 ± 6.0        | 69.2 ± 0.8        | 50.2 ± 2.7        | <b>95.4 ± 1.3</b> |
| Sacrecoeur   | 48.1 ± 2.4  | 66.6 ± 4.9        | 66.1 ± 3.4        | 47.1 ± 4.1        | 51.2 ± 3.1        | <b>84.5 ± 1.9</b> |
| Triomphe     | 59.5 ± 4.0  | 51.7 ± 3.9        | 63.3 ± 10.3       | 53.4 ± 0.6        | 49.0 ± 1.1        | <b>79.8 ± 3.4</b> |
| Avg          | 52.4 ± 3.8  | 60.4 ± 4.3        | 68.3 ± 3.5        | 58.8 ± 2.1        | 50.3 ± 2.5        | <b>82.6 ± 2.5</b> |
| CIFAR10      |             |                   |                   |                   |                   |                   |
| Plane        | 40.8 ± 9.4  | <b>71.9 ± 2.2</b> | 39.6 ± 6.3        | 66.7 ± 8.8        | 61.5 ± 2.4        | 69.1 ± 1.6        |
| Car          | 59.9 ± 3.4  | 42.8 ± 8.2        | 64.0 ± 9.9        | 74.3 ± 2.7        | 68.7 ± 6.1        | <b>80.7 ± 2.9</b> |
| Bird         | 44.8 ± 3.9  | <b>62.4 ± 4.4</b> | 42.4 ± 11.1       | 54.4 ± 6.7        | 51.3 ± 3.2        | 58.5 ± 2.5        |
| Cat          | 53.8 ± 3.7  | 61.7 ± 4.3        | 54.3 ± 7.3        | 52.5 ± 5.7        | 50.4 ± 4.8        | <b>63.2 ± 2.8</b> |
| Deer         | 50.1 ± 4.9  | 62.0 ± 3.2        | 50.0 ± 8.7        | 54.1 ± 5.8        | 52.1 ± 7.1        | <b>64.2 ± 2.2</b> |
| Dog          | 53.3 ± 4.3  | 61.3 ± 3.9        | <b>81.6 ± 3.9</b> | 60.5 ± 5.1        | 57.1 ± 5.7        | 65.4 ± 5.6        |
| Frog         | 50.4 ± 4.7  | 48.2 ± 4.6        | 58.0 ± 11.9       | 60.3 ± 6.8        | 55.3 ± 2.3        | <b>71.9 ± 3.3</b> |
| Horse        | 53.9 ± 2.9  | 51.6 ± 3.1        | <b>76.8 ± 5.4</b> | 62.9 ± 4.5        | 61.7 ± 3.2        | 73.7 ± 2.8        |
| Ship         | 46.0 ± 8.5  | 72.6 ± 3.4        | 71.6 ± 3.9        | 67.8 ± 8.7        | 71.3 ± 2.3        | <b>82.9 ± 0.8</b> |
| Truck        | 52.6 ± 4.2  | 39.3 ± 3.5        | 73.4 ± 4.2        | 70.3 ± 4.0        | <b>75.2 ± 2.5</b> | 72.6 ± 2.9        |
| Avg          | 50.5 ± 5.0  | 57.4 ± 4.1        | 61.1 ± 7.3        | 62.4 ± 5.9        | 60.5 ± 4.0        | <b>70.2 ± 2.7</b> |
| MNIST        |             |                   |                   |                   |                   |                   |
| 0            | 75.0 ± 4.7  | 80.3 ± 8.0        | <b>91.6 ± 1.1</b> | 75.0 ± 1.0        | 72.6 ± 6.8        | 80.1 ± 4.6        |
| 1            | 59.3 ± 13.1 | 78.0 ± 12.5       | 89.0 ± 5.8        | <b>96.2 ± 0.4</b> | 90.9 ± 3.2        | 88.8 ± 3.1        |
| 2            | 58.6 ± 5.7  | 58.8 ± 13.7       | 73.0 ± 8.8        | 80.1 ± 2.4        | 68 ± 5.6          | <b>85.2 ± 4.3</b> |
| 3            | 62.0 ± 6.1  | 66.9 ± 7.6        | 82.4 ± 3.2        | 91.0 ± 0.5        | 73.2 ± 9.3        | <b>96.3 ± 0.9</b> |
| 4            | 53.7 ± 7.8  | 71.2 ± 9.8        | 85.6 ± 0.9        | 79.3 ± 1.1        | 69.1 ± 6.2        | <b>89.1 ± 1.6</b> |
| 5            | 59.8 ± 5.2  | 63.7 ± 8.2        | 72.4 ± 4.0        | 87.2 ± 0.6        | 62.1 ± 13.4       | <b>87.4 ± 3.3</b> |
| 6            | 53.9 ± 4.8  | 74.0 ± 14.3       | 88.2 ± 2.5        | 83.6 ± 2.8        | 73.9 ± 4.6        | <b>92.2 ± 1.6</b> |
| 7            | 50.4 ± 6.5  | 77.1 ± 10.8       | 80.0 ± 7.5        | 78.4 ± 0.7        | 63 ± 6.5          | <b>84.2 ± 4.2</b> |
| 8            | 61.5 ± 4.8  | 69.1 ± 4.8        | <b>81.0 ± 0.9</b> | 64.7 ± 4.0        | 77.8 ± 5.4        | 78.2 ± 2.3        |
| 9            | 50.6 ± 7.0  | 82.9 ± 6.5        | 82.6 ± 3.2        | 78.7 ± 4.8        | 67.5 ± 6.2        | <b>90.2 ± 1.4</b> |
| Avg          | 58.5 ± 6.6  | 72.2 ± 9.6        | 82.6 ± 3.8        | 81.4 ± 1.8        | 71.8 ± 6.7        | <b>87.2 ± 2.7</b> |
| FashionMNIST |             |                   |                   |                   |                   |                   |
| T-shirt      | 50.9 ± 5.5  | 86.8 ± 3.3        | 83.5 ± 2.1        | <b>97.5 ± 0.5</b> | 79.7 ± 3.0        | 86.5 ± 1.1        |
| Trouser      | 52.9 ± 12.7 | 94.4 ± 4.0        | 63.6 ± 4.6        | 80.2 ± 0.75       | 97.5 ± 1.7        | <b>99.0 ± 0.2</b> |
| Pullover     | 69.2 ± 5.8  | 81.2 ± 3.4        | 66.7 ± 2.8        | <b>90.1 ± 1.6</b> | 89.2 ± 1.0        | 86.5 ± 1.1        |
| Dress        | 36.9 ± 8.5  | 88.1 ± 3.6        | 63.1 ± 0.8        | 91 ± 1.7          | 87.3 ± 1.5        | <b>91.7 ± 1.3</b> |
| Coat         | 67.9 ± 7.6  | 84.7 ± 3.5        | 63.6 ± 4.6        | 88.5 ± 4.3        | 86.9 ± 0.9        | <b>88.9 ± 1.2</b> |
| Sandals      | 54.1 ± 8.6  | 83.0 ± 12.4       | 64.9 ± 6.4        | 86.3 ± 1.0        | 72.5 ± 13.1       | <b>89.1 ± 1.6</b> |
| Shirt        | 55.6 ± 7.8  | 74.8 ± 3.8        | 75.1 ± 3.9        | <b>79.5 ± 2.5</b> | 76.3 ± 2.0        | 78.5 ± 0.8        |
| Sneaker      | 56.8 ± 7.8  | 93.3 ± 1.4        | 59.1 ± 3.9        | 97.8 ± 0.4        | 96.3 ± 1.2        | <b>99.0 ± 0.2</b> |
| Bag          | 56.1 ± 8.1  | 73.8 ± 10.2       | 72.4 ± 4.6        | <b>98.4 ± 0.3</b> | 77.9 ± 2.5        | 94.5 ± 0.4        |
| Ankle-Boot   | 60.3 ± 12.8 | 85.3 ± 3.7        | 71.2 ± 1.1        | 89.6 ± 0.7        | 97.5 ± 1.0        | <b>98.0 ± 0.6</b> |
| Avg          | 56.1 ± 8.5  | 84.5 ± 4.9        | 68.3 ± 3.5        | 89.9 ± 1.4        | 86.1 ± 2.8        | <b>91.2 ± 0.9</b> |

Table 6. Average AUC (with standard deviation) for **Ten-Shot** anomaly detection experiments on Paris, CIFAR10, FashionMNIST and MNIST datasets.

| Class             | PatchSVDD  | DROCC             | DeepSVDD   | GEOM              | GOAD        | Ours              |
|-------------------|------------|-------------------|------------|-------------------|-------------|-------------------|
| CIFAR10 (50-Shot) |            |                   |            |                   |             |                   |
| Plane             | 36.7 ± 6.7 | <b>76.2 ± 2.6</b> | 57.3 ± 2.6 | 67.8 ± 2.9        | 55.6 ± 6.4  | 75.9 ± 5.9        |
| Car               | 65.5 ± 3.6 | 44.7 ± 3.0        | 64.1 ± 1.6 | 82.4 ± 1.3        | 54.3 ± 7.9  | <b>86.2 ± 1.1</b> |
| Bird              | 38.1 ± 2.1 | <b>66.3 ± 1.2</b> | 46.5 ± 2.2 | 60.3 ± 3.1        | 52.0 ± 2.1  | 57.3 ± 1.9        |
| Cat               | 51.3 ± 3.9 | <b>61.4 ± 4.0</b> | 58.5 ± 2.2 | 59.6 ± 5.1        | 49.8 ± 0.6  | 60.5 ± 1.0        |
| Deer              | 46.3 ± 4.2 | 58.6 ± 2.9        | 53.7 ± 3.1 | 57.4 ± 5.2        | 50.4 ± 0.9  | <b>64.5 ± 1.0</b> |
| Dog               | 49.4 ± 3.4 | 63.3 ± 5.4        | 61.7 ± 2.3 | 68.6 ± 2.6        | 51.8 ± 3.8  | <b>74.7 ± 2.1</b> |
| Frog              | 54.0 ± 5.6 | 45.8 ± 2.6        | 58.0 ± 2.7 | 64.8 ± 2.8        | 50.7 ± 1.0  | <b>73.2 ± 1.6</b> |
| Horse             | 55.4 ± 3.1 | 47.4 ± 2.6        | 62.3 ± 3.2 | 72.4 ± 3.1        | 52.7 ± 5.4  | <b>74.5 ± 3.3</b> |
| Ship              | 44.0 ± 2.4 | 74.7 ± 2.7        | 75.1 ± 1.1 | 81.4 ± 1.7        | 59.3 ± 12.1 | <b>85.6 ± 0.6</b> |
| Truck             | 60.7 ± 4.7 | 37.4 ± 5.12       | 71.9 ± 1.9 | <b>81.1 ± 2.1</b> | 60.4 ± 11.0 | 76.8 ± 1.2        |
| Avg               | 50.1 ± 4.0 | 57.6 ± 3.2        | 60.9 ± 2.3 | 69.6 ± 3.0        | 53.7 ± 5.1  | <b>72.9 ± 2.0</b> |
| CIFAR10 (80-Shot) |            |                   |            |                   |             |                   |
| Plane             | 34.0 ± 4.5 | <b>79.0 ± 0.6</b> | 60.9 ± 2.1 | 69.9 ± 1.6        | 52.1 ± 4.3  | 74.8 ± 0.3        |
| Car               | 63.8 ± 6.9 | 43.2 ± 2.1        | 60.1 ± 0.8 | 85.3 ± 0.8        | 59.2 ± 11.3 | <b>88.0 ± 1.5</b> |
| Bird              | 40.0 ± 1.6 | <b>68.2 ± 0.3</b> | 44.6 ± 1.2 | 60.8 ± 2.4        | 50.7 ± 1.4  | 62.4 ± 1.2        |
| Cat               | 54.9 ± 1.3 | 55.7 ± 4.0        | 58.7 ± 0.2 | <b>62.9 ± 1.3</b> | 53.8 ± 4.6  | 60.1 ± 1.4        |
| Deer              | 50.0 ± 1.8 | 57.2 ± 3.4        | 56.3 ± 0.8 | 62.7 ± 0.3        | 50.1 ± 2.4  | <b>66.1 ± 0.5</b> |
| Dog               | 48.2 ± 3.2 | 64.4 ± 1.9        | 60.9 ± 1.7 | 76.5 ± 1.2        | 52.5 ± 5.0  | <b>78.4 ± 1.1</b> |
| Frog              | 57.0 ± 2.3 | 50.9 ± 6.9        | 58.5 ± 2.5 | 69.9 ± 4.0        | 51.5 ± 7.1  | <b>75.3 ± 5.4</b> |
| Horse             | 56.7 ± 1.8 | 47.6 ± 2.1        | 60.9 ± 0.1 | 79.9 ± 0.4        | 52.1 ± 3.9  | <b>82.3 ± 0.2</b> |
| Ship              | 44.0 ± 3.5 | 77.0 ± 2.1        | 74.8 ± 0.1 | 84.0 ± 1.2        | 70.4 ± 10.5 | <b>87.4 ± 0.8</b> |
| Truck             | 61.2 ± 2.9 | 42.4 ± 1.1        | 72.1 ± 1.7 | <b>83.4 ± 0.3</b> | 69.7 ± 9.9  | 81.2 ± 0.6        |
| Avg               | 51.0 ± 3.0 | 58.5 ± 2.5        | 60.8 ± 1.1 | 73.5 ± 1.4        | 56.2 ± 6.1  | <b>75.6 ± 1.3</b> |

Table 7. Average AUC (with standard deviation) for **50-shot** and **80-shot** anomaly detection experiments on CIFAR10.

| Class             | DifferNet         | DROCC              | PatchSVDD          | DeepSVDD    | GEOM              | GOAD        | Ours1              | Ours2              |
|-------------------|-------------------|--------------------|--------------------|-------------|-------------------|-------------|--------------------|--------------------|
| MVTec (One-Shot)  |                   |                    |                    |             |                   |             |                    |                    |
| Bottle            | <b>98.2 ± 0.4</b> | 67.2 ± 6.6         | 60.9 ± 12.3        | 16.6 ± 5.3  | 79.0 ± 3.5        | 51.6 ± 14.0 | 76.3 ± 6.9         | 85.0 ± 3.7         |
| Cable             | <b>76.6 ± 5.9</b> | 68.1 ± 4.3         | 58.8 ± 4.5         | 39.0 ± 3.5  | 64.2 ± 1.3        | 47.9 ± 2.4  | 72.3 ± 3.7         | 61.1 ± 7.8         |
| Capsule           | 57.7 ± 4.6        | 50.2 ± 6.4         | 57.9 ± 12.1        | 44.8 ± 4.4  | 55.4 ± 2.6        | 51.2 ± 3.7  | 56.0 ± 8.4         | <b>62.6 ± 6.7</b>  |
| Carpet            | 61.5 ± 3.0        | 71.9 ± 10.6        | 45.5 ± 18.8        | 41.2 ± 18.2 | 55.0 ± 10.1       | 48.1 ± 1.9  | <b>72.7 ± 6.7</b>  | <b>83.7 ± 8.7</b>  |
| Grid              | 59.2 ± 5.1        | 50.0 ± 4.6         | 37.2 ± 12.2        | 79.7 ± 8.6  | 40.1 ± 13.1       | 9.4 ± 6.8   | 73.2 ± 9.8         | <b>87.1 ± 5.0</b>  |
| Hazelnut          | <b>90.7 ± 2.7</b> | 66.4 ± 7.6         | 46.7 ± 16.1        | 29.1 ± 4.3  | 47.8 ± 3.6        | 47.6 ± 3.2  | 82.4 ± 8.7         | 66.5 ± 9.2         |
| Leather           | 83.4 ± 1.9        | 79.1 ± 6.5         | 61.9 ± 15.6        | 48.0 ± 3.2  | 33.2 ± 0.5        | 58.1 ± 6.8  | <b>98.2 ± 0.9</b>  | 97.6 ± 1.1         |
| Metalnut          | 44.4 ± 8.0        | 51.9 ± 3.6         | 50.4 ± 13.1        | 42.6 ± 14.7 | 52.3 ± 4.2        | 7.2 ± 6.5   | <b>66.0 ± 11.0</b> | 60.3 ± 8.6         |
| Pill              | 71.7 ± 4.4        | <b>72.5 ± 4.0</b>  | 57.6 ± 8.1         | 33.5 ± 4.0  | 67.0 ± 2.3        | 62.5 ± 8.1  | 56.5 ± 9.6         | 66.5 ± 7.0         |
| Screw             | 61.8 ± 7.7        | 57.7 ± 9.0         | 53.7 ± 18.2        | 70.1 ± 10.8 | 34.7 ± 11.1       | 6.3 ± 10.0  | <b>93.5 ± 6.2</b>  | 92.8 ± 6.0         |
| Tile              | <b>87.3 ± 2.6</b> | 65.6 ± 2.0         | 57.3 ± 4.7         | 40.7 ± 2.8  | 61.0 ± 2.8        | 6.0 ± 5.4   | 80.2 ± 8.2         | 84.4 ± 3.8         |
| Toothbrush        | 52.1 ± 2.3        | <b>68.9 ± 4.5</b>  | 63.7 ± 6.1         | 35.5 ± 1.5  | 65.7 ± 6.5        | 54.4 ± 5.4  | 67.3 ± 4.7         | 64.7 ± 11.1        |
| Transistor        | 47.0 ± 6.5        | 59.9 ± 3.3         | <b>66.7 ± 14.5</b> | 32.8 ± 4.3  | 58.1 ± 1.5        | 61.7 ± 4.4  | 66.1 ± 7.7         | 62.7 ± 6.8         |
| Wood              | <b>96.0 ± 2.2</b> | 70.6 ± 14.4        | 55.7 ± 18.4        | 44.0 ± 16.4 | 52.3 ± 1.1        | 41.8 ± 6.5  | 89.0 ± 4.2         | 85.5 ± 7.9         |
| Zipper            | 52.7 ± 3.7        | 49.6 ± 7.5         | 69 ± 5.4           | 34.9 ± 2.8  | 58.3 ± 2.8        | 56.8 ± 4.0  | <b>67.8 ± 6.4</b>  | <b>73.2 ± 7.7</b>  |
| Avg               | 69.4 ± 4.1        | 63.3 ± 6.3         | 56.2 ± 12.0        | 42.1 ± 7.0  | 54.9 ± 4.5        | 44.0 ± 5.9  | <b>74.5 ± 6.9</b>  | <b>75.6 ± 6.7</b>  |
| MVTec (Five-Shot) |                   |                    |                    |             |                   |             |                    |                    |
| Bottle            | <b>98.4 ± 0.2</b> | 68.1 ± 2.6         | 61.1 ± 12.4        | 15.7 ± 2.8  | 80.0 ± 1.2        | 51.7 ± 10.4 | 74.1 ± 7.8         | 90.8 ± 3.7         |
| Cable             | <b>81.3 ± 2.0</b> | 68.7 ± 2.7         | 49 ± 3.9           | 32.8 ± 4.9  | 61.1 ± 3.1        | 46.3 ± 4.4  | 75.2 ± 4.8         | 76.1 ± 4.0         |
| Capsule           | 59.0 ± 2.2        | 53.2 ± 5.1         | 55.1 ± 3.4         | 45.3 ± 4.7  | 60.0 ± 2.3        | 47.7 ± 5.9  | 52.6 ± 6.5         | <b>64.9 ± 5.6</b>  |
| Carpet            | 62.0 ± 2.2        | 71.6 ± 10.9        | 46.5 ± 4.1         | 47.7 ± 10.5 | 42.2 ± 6.7        | 44.2 ± 6.9  | <b>73.3 ± 7.6</b>  | 65.2 ± 6.4         |
| Grid              | 56.7 ± 3.9        | 37.3 ± 9.7         | 41.7 ± 22.1        | 76.0 ± 11.1 | 36.8 ± 7.2        | 21.3 ± 16.4 | <b>76.0 ± 4.9</b>  | <b>82.4 ± 9.7</b>  |
| Hazelnut          | <b>93.8 ± 1.0</b> | 70.0 ± 10.9        | 58.6 ± 17.4        | 27.7 ± 4.6  | 31.7 ± 8.2        | 52.5 ± 3.5  | 76.8 ± 8.3         | 84.5 ± 8.8         |
| Leather           | 83.7 ± 0.8        | 70.4 ± 7.1         | 61.6 ± 15.4        | 43.0 ± 2.0  | 33.3 ± 0.2        | 53.2 ± 10.3 | <b>99.0 ± 0.3</b>  | <b>98.2 ± 0.9</b>  |
| Metalnut          | 47.2 ± 3.2        | 59.7 ± 6.2         | 48.8 ± 9.1         | 52.9 ± 6.6  | 36.8 ± 4.3        | 59.4 ± 5.6  | <b>69.4 ± 11.4</b> | <b>76.4 ± 6.5</b>  |
| Pill              | <b>79.4 ± 4.4</b> | 74.4 ± 3.5         | 57.5 ± 10.6        | 34.4 ± 3.5  | 59.1 ± 3.1        | 61.5 ± 11.0 | 51.2 ± 6.8         | 63.6 ± 4.1         |
| Screw             | 73.7 ± 5.1        | 58.3 ± 2.3         | 43.4 ± 15.1        | 69.5 ± 3.8  | 18.5 ± 5.1        | 9.3 ± 13.6  | <b>97.7 ± 3.2</b>  | <b>74.8 ± 1.3</b>  |
| Tile              | <b>91.1 ± 1.4</b> | 65.7 ± 3.1         | 49.5 ± 3.0         | 32.4 ± 3.2  | 56.9 ± 11.1       | 58.6 ± 3.9  | 89.0 ± 4.5         | 81.0 ± 4.4         |
| Toothbrush        | 57.3 ± 3.6        | 67.6 ± 3.6         | 68.3 ± 11.8        | 34.9 ± 6.7  | 72.2 ± 2.1        | 45.3 ± 4.5  | <b>72.7 ± 8.1</b>  | 64.2 ± 7.3         |
| Transistor        | 55.7 ± 3.9        | 67.2 ± 4.1         | 55.3 ± 9.9         | 30.4 ± 2.6  | 59.4 ± 2.9        | 62.8 ± 4.0  | <b>78.2 ± 4.2</b>  | <b>76.2 ± 3.9</b>  |
| Wood              | <b>96.4 ± 1.9</b> | 77.7 ± 11.9        | 69.4 ± 14.6        | 11.0 ± 7.3  | 66.0 ± 9.8        | 37.4 ± 9.8  | 84.5 ± 3.6         | 96.2 ± 1.8         |
| Zipper            | 46.1 ± 3.7        | 45.2 ± 6.1         | 63.9 ± 6.5         | 34.4 ± 4.6  | 59.2 ± 6.2        | 54.1 ± 8.   | 61.8 ± 7.2         | <b>73.3 ± 10.7</b> |
| Avg               | 72.1 ± 2.6        | 63.7 ± 6.0         | 55.3 ± 10.6        | 39.2 ± 5.3  | 51.5 ± 4.9        | 47.0 ± 7.9  | <b>75.4 ± 5.9</b>  | <b>77.9 ± 5.3</b>  |
| MVTec (Ten-Shot)  |                   |                    |                    |             |                   |             |                    |                    |
| Bottle            | <b>98.2 ± 0.4</b> | 67.7 ± 5.1         | 65.3 ± 9.6         | 17.6 ± 3.0  | 80.1 ± 2.5        | 86.9 ± 4.5  | 81.9 ± 6.1         | 90.5 ± 3.1         |
| Cable             | <b>82.3 ± 1.5</b> | 69.4 ± 3.0         | 51.1 ± 7.7         | 32.6 ± 2.5  | 64.4 ± 0.8        | 46.0 ± 9.9  | 73.9 ± 4.2         | 77.6 ± 3.9         |
| Capsule           | 58.0 ± 2.1        | 51.8 ± 6.3         | 64.4 ± 11.1        | 44.7 ± 2.9  | <b>65.9 ± 0.8</b> | 47.3 ± 2.0  | 55.8 ± 7.7         | 59.3 ± 8.4         |
| Carpet            | 61.8 ± 1.5        | <b>75.1 ± 16.4</b> | 49.4 ± 7.4         | 40.0 ± 11.6 | 41.4 ± 7.0        | 50.9 ± 8.5  | 66.9 ± 9.6         | 63.9 ± 6.8         |
| Grid              | 58.5 ± 2.1        | 37.5 ± 17.1        | 49.8 ± 11.1        | 67.1 ± 10.6 | 10.3 ± 6.7        | 54.0 ± 7.1  | <b>71.0 ± 8.6</b>  | <b>79.0 ± 5.9</b>  |
| Hazelnut          | <b>93.2 ± 1.3</b> | 72.7 ± 11.9        | 37.9 ± 12.0        | 30.5 ± 5.2  | 45.1 ± 1.6        | 49.6 ± 2.7  | 72.1 ± 8.2         | 79.3 ± 11.3        |
| Leather           | 83.4 ± 0.9        | 79.1 ± 13.8        | 49.3 ± 15.9        | 43.5 ± 2.8  | 32.7 ± 0.8        | 61.2 ± 5.2  | <b>99.1 ± 0.2</b>  | 98.5 ± 0.5         |
| Metalnut          | 53.4 ± 7.4        | 59.1 ± 6.6         | 62.3 ± 12.5        | 52.4 ± 3.9  | 49.3 ± 1.4        | 58.6 ± 6.7  | 60.4 ± 11.8        | 74.0 ± 8.4         |
| Pill              | <b>81.8 ± 3.5</b> | 77.6 ± 3.6         | 65.2 ± 8.4         | 39.1 ± 3.9  | 56.1 ± 1.2        | 64.1 ± 3.0  | 57.4 ± 10.4        | 66.5 ± 7.0         |
| Screw             | 78.3 ± 4.3        | 84.2 ± 19.8        | 28.8 ± 21.3        | 65.2 ± 4.3  | 8.5 ± 6.3         | 66.7 ± 0.8  | <b>93.9 ± 8.4</b>  | 75.7 ± 19.0        |
| Tile              | <b>91.3 ± 1.2</b> | 64.8 ± 4.2         | 49.0 ± 3.1         | 26.0 ± 5.0  | 62.0 ± 0.3        | 54.3 ± 3.5  | 87.6 ± 5.5         | 81.4 ± 6.9         |
| Toothbrush        | 57.5 ± 4.0        | 67.9 ± 3.3         | 67.3 ± 9.6         | 38.2 ± 7.6  | 71.5 ± 0.4        | 51.3 ± 8.6  | <b>78.9 ± 8.5</b>  | 69.5 ± 7.7         |
| Transistor        | 54.6 ± 3.7        | 72.5 ± 3.6         | 60.3 ± 6.2         | 24.6 ± 4.5  | 58.9 ± 3.1        | 56.0 ± 8.4  | <b>74.9 ± 3.7</b>  | 79.2 ± 4.7         |
| Wood              | <b>96.2 ± 1.9</b> | 84.0 ± 8.2         | 47.9 ± 12.3        | 18.3 ± 11.6 | 67.7 ± 5.5        | 37.4 ± 5.9  | 85.0 ± 5.9         | 95.8 ± 1.1         |
| Zipper            | 55.2 ± 6.1        | 50.0 ± 6.7         | 66.7 ± 4.8         | 36.1 ± 4.5  | 60.9 ± 2.2        | 53.1 ± 12.3 | <b>72.8 ± 6.5</b>  | <b>80.4 ± 5.9</b>  |
| Avg               | 73.6 ± 2.8        | 67.6 ± 8.6         | 54.3 ± 10.2        | 38.4 ± 5.6  | 51.6 ± 2.7        | 55.8 ± 5.9  | <b>75.4 ± 7.0</b>  | <b>78.0 ± 6.7</b>  |

Table 8. Average AUC (with standard deviation) for **One-Shot**, **Five-Shot** and **Ten-Shot** defect detection experiments on MVTec dataset. **Ours1** refers to our method where the standard set of transformations are used, as for anomaly detection. For a fair comparison with DifferNet, we also consider **Ours2**, where only the four rotation are used, as in DifferNet. In the one-shot case, we report the results of using 5% of the patches, while in five-shot and ten-shot case we report the results of using 10% of the patches. The full results of using different percentage of patches are given in Tab. 10

| Class                        | Ours              | (a)         | (b)               | (c)         | (d)               | (e)               | (f)        | (g)               |
|------------------------------|-------------------|-------------|-------------------|-------------|-------------------|-------------------|------------|-------------------|
| CIFAR10 (One-Shot Ablation)  |                   |             |                   |             |                   |                   |            |                   |
| Plane                        | <b>67.2 ± 5.8</b> | 58.9 ± 12.5 | 65.2 ± 10.6       | 65.2 ± 5.6  | 59.9 ± 9.9        | 60.1 ± 5.9        | 27.0 ± 0.4 | 38.2 ± 3.9        |
| Car                          | <b>65.6 ± 5.9</b> | 61.6 ± 7.8  | 65.5 ± 3.5        | 58.3 ± 3.6  | 55.0 ± 8.6        | 63.6 ± 5.8        | 59.1 ± 1.4 | 57.6 ± 4.2        |
| Bird                         | 55.9 ± 5.7        | 52.6 ± 6.3  | <b>56.0 ± 4.2</b> | 54.2 ± 3.2  | 52.9 ± 5.9        | 48.9 ± 6.8        | 44.7 ± 1.3 | 46.3 ± 2.1        |
| Cat                          | 58.9 ± 6.2        | 53.8 ± 8.0  | 55.7 ± 3.2        | 56.8 ± 3.6  | 48.2 ± 6.6        | 54.3 ± 5.4        | 54.9 ± 1.0 | <b>66.4 ± 3.1</b> |
| Deer                         | 67.2 ± 4.5        | 61.9 ± 6.8  | 55.7 ± 8.9        | 56.5 ± 10.1 | <b>67.8 ± 2.6</b> | 53.6 ± 8.1        | 51.4 ± 2.8 | 67.3 ± 5.5        |
| Dog                          | 63.7 ± 7.7        | 61.0 ± 7.8  | 53.0 ± 4.1        | 60.0 ± 3.4  | 55.8 ± 7.8        | 57.5 ± 7.6        | 50.0 ± 2.8 | <b>65.9 ± 5.1</b> |
| Frog                         | <b>70.2 ± 5.1</b> | 65.1 ± 9.9  | 56.4 ± 8.1        | 62.5 ± 4.2  | 62.3 ± 9.6        | 57.5 ± 8.1        | 58.0 ± 2.1 | 68.2 ± 4.2        |
| Horse                        | <b>63.8 ± 5.2</b> | 61.8 ± 7.8  | 53.7 ± 4.1        | 59.4 ± 3.5  | 54.6 ± 7.6        | 59.7 ± 7.8        | 51.8 ± 0.5 | 39.8 ± 3.4        |
| Ship                         | <b>71.3 ± 7.2</b> | 70.4 ± 9.5  | 65.1 ± 10.2       | 62.6 ± 7.5  | 69.5 ± 9.4        | 58.1 ± 8.5        | 33.9 ± 2.3 | 65.1 ± 3.5        |
| Truck                        | 65.3 ± 5.2        | 60.3 ± 8.8  | 64.8 ± 4.1        | 61.2 ± 7.2  | 50.0 ± 6.2        | 59.1 ± 4.8        | 46.5 ± 3.3 | <b>74.1 ± 3.7</b> |
| Avg                          | <b>64.9 ± 5.9</b> | 60.7 ± 8.5  | 59.1 ± 6.1        | 59.7 ± 5.2  | 57.6 ± 7.4        | 57.3 ± 6.9        | 47.7 ± 1.8 | 58.8 ± 3.9        |
| CIFAR10 (Five-Shot Ablation) |                   |             |                   |             |                   |                   |            |                   |
| Plane                        | <b>69.2 ± 2.8</b> | 68.1 ± 2.7  | 65.1 ± 8.4        | 61.4 ± 3.9  | 57.8 ± 7.8        | 65.9 ± 3.9        | 25.9 ± 0.3 | 50.7 ± 3.1        |
| Car                          | <b>77.0 ± 1.8</b> | 75.2 ± 4.6  | 59.2 ± 8.6        | 70.2 ± 2.7  | 56.7 ± 4.9        | 70.6 ± 5.1        | 60.0 ± 1.0 | 73.1 ± 2.7        |
| Bird                         | 58.4 ± 2.3        | 52.7 ± 2.2  | 58.4 ± 3.3        | 56.2 ± 2.4  | <b>58.9 ± 6.5</b> | 51.5 ± 5.1        | 45.2 ± 0.6 | 50.4 ± 2.0        |
| Cat                          | <b>58.7 ± 4.3</b> | 55.1 ± 4.9  | 53.7 ± 3.2        | 58.2 ± 4.2  | 50.4 ± 7.6        | 53.8 ± 5.9        | 55.7 ± 1.0 | 56.3 ± 2.5        |
| Deer                         | <b>66.4 ± 4.3</b> | 63.1 ± 4.2  | 66.2 ± 5.5        | 61.3 ± 4.9  | 64.9 ± 4.9        | 60.2 ± 3.5        | 50.9 ± 0.7 | 59.4 ± 5.0        |
| Dog                          | 61.8 ± 3.2        | 57.4 ± 9.6  | 53.5 ± 2.9        | 61.2 ± 3.9  | 50.5 ± 8.3        | <b>64.1 ± 3.3</b> | 51.4 ± 1.5 | 60.9 ± 4.0        |
| Frog                         | <b>72.6 ± 4.4</b> | 66.1 ± 4.7  | 67.1 ± 8.3        | 66.3 ± 6.8  | 65.4 ± 0.3        | 64.1 ± 2.5        | 57.7 ± 0.8 | 69.1 ± 4.1        |
| Horse                        | <b>68.6 ± 2.8</b> | 67.6 ± 5.9  | 55.3 ± 3.0        | 63.3 ± 2.6  | 55.5 ± 11.4       | 66.9 ± 5.7        | 51.8 ± 0.4 | 66.9 ± 3.0        |
| Ship                         | <b>80.2 ± 3.2</b> | 76.2 ± 5.2  | 66.2 ± 6.2        | 67.5 ± 6.0  | 65.3 ± 6.8        | 72.2 ± 5.5        | 34.1 ± 1.2 | 76.4 ± 3.2        |
| Truck                        | 62.1 ± 3.4        | 67.8 ± 3.8  | 55.3 ± 7.2        | 66.5 ± 3.7  | 53.0 ± 3.2        | 68.7 ± 5.9        | 47.4 ± 1.5 | <b>74.3 ± 3.1</b> |
| Avg                          | <b>67.5 ± 3.4</b> | 64.9 ± 4.8  | 60.0 ± 5.7        | 63.4 ± 4.1  | 57.8 ± 6.2        | 63.8 ± 4.6        | 48.0 ± 0.9 | 63.7 ± 3.3        |

Table 9. **Ablation analysis** for **One-Shot** and **Five-Shot** anomaly detection, as described in the main text, Sec. 4.3, Tab. 1. Our method relies on three components: (1) a generative model, (2) its hierarchical multi-scale nature, and (3) a transformation-discriminating component. We assess the contribution of these components separately. The columns of the table represent different variants: (a) no generative component, (b) transformations not applied discriminatively, (c) as for (b), but where augmentations are applied before passing real and generated images to the discriminator. (d) a single scale of the hierarchy where small patches are considered (image size set to  $100 \times 100$ ), (e) a single scale of the hierarchy where large patches are considered (image size set to  $20 \times 20$ ), (f) no component is used and the anomaly score is the MSE between the test image and the training image (average for each training image for five-shot). Finally, the last variant (g) trains a GEOM model on 6,000 images sampled from our generative model that is trained on a one/five sample.



| Fraction (%)      | 1           | 5           | 10          | 20          | 50          | 100         |
|-------------------|-------------|-------------|-------------|-------------|-------------|-------------|
| MVTec (One-Shot)  |             |             |             |             |             |             |
| Bottle            | 75.4 ± 12.6 | 85.0 ± 3.7  | 76.5 ± 9.0  | 82.5 ± 9.0  | 81.6 ± 6.3  | 67.0 ± 9.4  |
| Cable             | 57.4 ± 9.3  | 61.1 ± 7.8  | 67.8 ± 3.6  | 59.7 ± 11.9 | 62.0 ± 10.7 | 54.0 ± 10.6 |
| Capsule           | 59.2 ± 11.4 | 62.6 ± 6.7  | 59.7 ± 6.2  | 61.9 ± 6.4  | 57.5 ± 6.0  | 58.4 ± 7.9  |
| Carpet            | 81.4 ± 7.7  | 83.7 ± 8.7  | 81.6 ± 9.2  | 84.4 ± 4.9  | 80.2 ± 10.4 | 69.8 ± 8.2  |
| Grid              | 91.3 ± 4.8  | 87.1 ± 5.0  | 83.3 ± 7.1  | 82.6 ± 5.2  | 71.7 ± 7.9  | 58.7 ± 8.4  |
| Hazelnut          | 67.0 ± 10.1 | 66.5 ± 9.2  | 69.3 ± 10.0 | 67.4 ± 8.4  | 61.6 ± 13.9 | 65.2 ± 10.1 |
| Leather           | 98.0 ± 1.1  | 97.6 ± 1.1  | 96.7 ± 1.8  | 95.4 ± 2.8  | 93.7 ± 4.2  | 81.7 ± 11.6 |
| Metal-nut         | 69.4 ± 14.0 | 60.3 ± 8.6  | 65.8 ± 9.9  | 64.9 ± 10.4 | 61.9 ± 13.6 | 67.0 ± 9.8  |
| Pill              | 66.8 ± 5.9  | 66.5 ± 7.0  | 66.1 ± 6.9  | 64.3 ± 6.3  | 64.7 ± 8.2  | 59.0 ± 7.4  |
| Screw             | 92.9 ± 6.4  | 92.8 ± 6.0  | 89.1 ± 6.9  | 89.9 ± 7.0  | 87.7 ± 6.9  | 61.8 ± 6.9  |
| Tile              | 85.1 ± 3.0  | 84.4 ± 3.8  | 83.0 ± 8.9  | 84.2 ± 4.1  | 79.1 ± 5.4  | 57.7 ± 4.4  |
| Toothbrush        | 61.9 ± 11.5 | 64.7 ± 11.1 | 57.5 ± 5.9  | 58.4 ± 6.6  | 59.1 ± 6.4  | 56.9 ± 7.4  |
| Transistor        | 60.3 ± 7.3  | 62.7 ± 6.8  | 67.8 ± 5.8  | 63.9 ± 8.4  | 64.3 ± 8.4  | 66.8 ± 10.2 |
| Wood              | 82.0 ± 11.7 | 85.5 ± 7.9  | 81.7 ± 9.9  | 82.9 ± 9.9  | 81.2 ± 11.4 | 71.7 ± 11.1 |
| Zipper            | 78.3 ± 8.7  | 73.2 ± 7.7  | 71.4 ± 9.7  | 72.5 ± 6.3  | 72.7 ± 4.9  | 63.6 ± 14.9 |
| Avg               | 75.1 ± 8.4  | 75.6 ± 6.7  | 74.5 ± 7.4  | 74.3 ± 7.2  | 71.9 ± 8.3  | 63.9 ± 9.2  |
| MVTec (Five-Shot) |             |             |             |             |             |             |
| Bottle            | 87.1 ± 6.5  | 90.2 ± 6.7  | 90.8 ± 3.7  | 88.3 ± 5.9  | 86.3 ± 9.6  | 84.4 ± 5.0  |
| Cable             | 71.6 ± 3.4  | 74.0 ± 3.4  | 76.1 ± 4.0  | 74.5 ± 4.1  | 74.7 ± 4.5  | 74.3 ± 4.5  |
| Capsule           | 56.0 ± 6.1  | 60.2 ± 8.5  | 64.9 ± 5.6  | 57.0 ± 7.7  | 50.2 ± 6.8  | 51.1 ± 5.5  |
| Carpet            | 76.3 ± 9.1  | 72.9 ± 8.0  | 65.2 ± 6.4  | 59.7 ± 11.4 | 62.6 ± 10.9 | 46.6 ± 6.8  |
| Grid              | 90.3 ± 4.5  | 86.8 ± 4.7  | 82.4 ± 9.7  | 78.1 ± 7.9  | 68.2 ± 3.9  | 51.8 ± 6.2  |
| Hazelnut          | 83.6 ± 4.2  | 82.2 ± 8.0  | 84.5 ± 8.8  | 76.7 ± 8.8  | 78.6 ± 7.7  | 70.4 ± 10.8 |
| Leather           | 98.8 ± 0.9  | 98.6 ± 0.7  | 98.2 ± 0.9  | 96.9 ± 1.3  | 95.4 ± 2.2  | 76.6 ± 8.4  |
| Metal-nut         | 70.1 ± 8.7  | 72.1 ± 7.7  | 76.4 ± 6.5  | 70.0 ± 7.2  | 75.3 ± 8.0  | 80.5 ± 5.3  |
| Pill              | 66.4 ± 6.3  | 64.3 ± 7.5  | 63.6 ± 4.1  | 63.1 ± 8.6  | 60.6 ± 6.4  | 60.0 ± 4.3  |
| Screw             | 77.4 ± 8.3  | 76.4 ± 6.7  | 74.8 ± 1.3  | 64.1 ± 11.5 | 56.5 ± 13.1 | 43.1 ± 5.9  |
| Tile              | 81.9 ± 6.3  | 80.4 ± 6.0  | 81.0 ± 4.4  | 75.4 ± 9.7  | 73.6 ± 9.4  | 50.2 ± 4.9  |
| Toothbrush        | 61.2 ± 6.2  | 62.2 ± 8.9  | 64.2 ± 7.3  | 60.9 ± 10.5 | 60.9 ± 7.7  | 62.2 ± 4.6  |
| Transistor        | 74.8 ± 4.5  | 74.4 ± 6.4  | 76.2 ± 3.9  | 76.4 ± 6.6  | 80.2 ± 8.0  | 78.7 ± 5.1  |
| Wood              | 95.7 ± 1.9  | 96.4 ± 2.1  | 96.2 ± 1.8  | 94.7 ± 3.0  | 93.0 ± 4.9  | 93.5 ± 6.5  |
| Zipper            | 79.2 ± 8.1  | 74.8 ± 8.8  | 73.3 ± 10.7 | 75.0 ± 7.9  | 74.8 ± 6.6  | 78.6 ± 6.7  |
| Avg               | 78.0 ± 5.7  | 77.7 ± 6.3  | 77.9 ± 5.3  | 74.0 ± 7.5  | 72.7 ± 7.3  | 66.8 ± 6.0  |
| MVTec (Ten-Shot)  |             |             |             |             |             |             |
| Bottle            | 92.4 ± 3.3  | 92.7 ± 2.6  | 90.5 ± 3.1  | 90.7 ± 4.7  | 90.2 ± 2.4  | 85.9 ± 3.8  |
| Cable             | 75.2 ± 5.2  | 76.9 ± 4.1  | 77.6 ± 3.9  | 75.6 ± 4.5  | 74.8 ± 4.1  | 74.7 ± 3.5  |
| Capsule           | 57.9 ± 7.5  | 60.1 ± 8.7  | 59.3 ± 8.4  | 52.1 ± 6.6  | 58.5 ± 6.6  | 51.9 ± 6.6  |
| Carpet            | 64.4 ± 7.0  | 60.7 ± 4.1  | 63.9 ± 6.8  | 52.6 ± 5.8  | 52.9 ± 1.8  | 44.9 ± 1.1  |
| Grid              | 88.1 ± 7.1  | 83.7 ± 5.3  | 79.0 ± 5.9  | 73.9 ± 7.7  | 65.8 ± 6.4  | 52.6 ± 4.5  |
| Hazelnut          | 80.7 ± 6.3  | 82.9 ± 6.7  | 79.3 ± 11.3 | 80.3 ± 6.5  | 74.5 ± 10.6 | 68.5 ± 11.1 |
| Leather           | 99.2 ± 0.7  | 99.1 ± 0.6  | 98.5 ± 0.5  | 97.7 ± 1.2  | 95.6 ± 1.8  | 76.1 ± 8.5  |
| Metal-nut         | 75.3 ± 7.6  | 75.4 ± 8.5  | 74.0 ± 8.4  | 74.9 ± 7.7  | 75.9 ± 7.6  | 82.5 ± 2.6  |
| Pill              | 64.8 ± 6.2  | 65.1 ± 5.7  | 66.5 ± 7.0  | 60.5 ± 7.2  | 56.3 ± 7.9  | 59.5 ± 4.5  |
| Screw             | 72.4 ± 7.7  | 71.7 ± 9.2  | 75.7 ± 19.0 | 67.8 ± 15.5 | 65.9 ± 15.9 | 41.5 ± 3.2  |
| Tile              | 83.1 ± 4.6  | 81.7 ± 3.9  | 81.4 ± 6.9  | 78.7 ± 2.7  | 70.4 ± 6.4  | 51.7 ± 4.9  |
| Toothbrush        | 61.5 ± 6.0  | 63.2 ± 3.6  | 69.5 ± 7.7  | 59.6 ± 3.3  | 60.7 ± 3.9  | 64.1 ± 4.9  |
| Transistor        | 74.9 ± 2.0  | 74.8 ± 3.7  | 79.2 ± 4.7  | 74.7 ± 5.6  | 80.3 ± 5.2  | 82.9 ± 5.3  |
| Wood              | 94.5 ± 0.6  | 95.0 ± 1.2  | 95.8 ± 1.1  | 94.8 ± 1.8  | 95.3 ± 1.1  | 95.7 ± 1.4  |
| Zipper            | 85.6 ± 4.9  | 81.3 ± 6.6  | 80.4 ± 5.9  | 77.3 ± 6.9  | 77.3 ± 5.8  | 79.6 ± 4.7  |
| Avg               | 78.0 ± 5.1  | 77.6 ± 5.0  | 78.0 ± 6.7  | 74.1 ± 5.8  | 73.0 ± 5.8  | 67.5 ± 4.7  |

Table 10. Effect of using a different **percentage of patches** for defect detection in the **One-Shot**, **Five-Shot** and **Ten-Shot** settings, as described in the main text, Sec. 4.3, Fig. 7.
